# Supplementary material
Source: PubMed Central journal article supplement (PMC2265152)
Supplement: pnas_0712384105_1.pdf [file pnas_0712384105_1.pdf]

**Table 3. Candidate chromosome instability (CIN) genes analyzed**

| Gene No. | Yeast gene | Human gene  | E-value   | Protein Accession | miRNA Accession | Number of Exons | Transcript length (b) | Coding sequences |
|----------|------------|-------------|-----------|-------------------|-----------------|-----------------|-----------------------|------------------|
| 1        | ADE1       | PAICS       | 6.00E-08  | NP_006443         | NM_006452.2     | 10              | 3304                  | 1353             |
| 2        | ADE5,7     | GART        | 0.00E+00  | NP_000810         | NM_000819.3     | 22              | 3469                  | 3030             |
| 3        | ADE6       | PFAS        | 1.00E-176 | NP_036525         | NM_012393.1     | 28              | 5368                  | 4014             |
| 4        | AOR1       | CFDP1       | 5.00E-10  | NP_006315         | NM_006324.1     | 7               | 1279                  | 897              |
| 5        | ARP6       | ACTR6       | 2.00E-44  | NP_071941         | NM_022496.2     | 11              | 2464                  | 1188             |
| 6        | ASF1       | ASF1A       | 8.00E-51  | NP_054753         | NM_014034.1     | 3               | 507                   | 504              |
| 7        | BIM1       | MAPRE1      | 2.00E-28  | NP_036457         | NM_012325.1     | 7               | 2588                  | 804              |
| 8        | BRE1       | RPN20       | 5.00E-26  | NP_062538         | NM_019592.5     | 20              | 3946                  | 2931             |
| 9        | BUB3       | BUB3        | 2.00E-24  | NP_004716         | NM_004725.1     | 8               | 2731                  | 984              |
| 10       | CDC6       | CDC6        | 2.00E-32  | NP_001245         | NM_001254.2     | 12              | 3053                  | 1680             |
| 11       | CDC73      | CDC73       | 9.00E-12  | NP_078805         | NM_024529.3     | 17              | 4969                  | 1593             |
| 12       | CDH1       | FZR1        | 1.00E-92  | NP_057347         | NM_016263.2     | 14              | 2978                  | 1479             |
| 13       | CHL1       | CHLR1/DDX11 | 1.00E-112 | NP_085911         | NM_030653.2     | 27              | 3887                  | 2910             |
| 14       | CHL1       | CHLR2/DDX12 | 4.00E-94  | AAB06963.1        | U33834          | 19              | 2202                  | 2202             |
| 15       | CIK1       | GOLGA4      | 4.00E-07  | NP_002069         | NM_002078.3     | 24              | 7696                  | 6690             |
| 16       | CIN8       | KIF11       | 2.00E-67  | NP_004514         | NM_004523.2     | 22              | 4910                  | 3168             |
| 17       | CLB5       | CCNB1       | 6.00E-39  | NP_114172         | NM_031966.2     | 9               | 2169                  | 1299             |
| 18       | CSM3       | TIPIN       | 8.00E-08  | NP_060328         | NM_017858.1     | 8               | 1087                  | 903              |
| 19       | CTF18      | CHTF18      | 3.00E-36  | NP_071375         | NM_022092.1     | 21              | 3051                  | 3048             |
| 20       | CTF3       | CENPI       | N/A       | NP_006724         | NM_006733.2     | 21              | 3262                  | 2268             |
| 21       | CTF4       | WDHD1       | 1.00E-18  | NP_009017         | NM_007086.1     | 26              | 4734                  | 3387             |
| 22       | CTF8       | CTF8        | N/A       | NP_001035236.1    | NM_001039690    | 4               | 2911                  | 1572             |
| 23       | CTK2       | CCNK        | 2.00E-11  | NP_003849         | NM_003858.2     | 10              | 1198                  | 1065             |
| 24       | DCC1       | DCC1        | 8.00E-11  | NP_076999         | NM_024094.1     | 9               | 2212                  | 1179             |
| 25       | DJP1       | DNAJC10     | 4.00E-18  | NP_061854         | NM_018981.1     | 24              | 4428                  | 2379             |
| 26       | DOC1       | ANAPC10     | 5.00E-22  | NP_055700         | NM_014885.1     | 5               | 863                   | 555              |
| 27       | ECO1       | ESCO1       | 5.00E-11  | NP_443143         | NM_052911.1     | 12              | 4649                  | 2520             |
| 28       | ECO1       | ESCO2       | 3.00E-07  | NP_001017420.1    | NM_001017420    | 11              | 3663                  | 1803             |
| 29       | ELG1       | C17orf41    | 2.00E-05  | NP_079133         | NM_024857.3     | 23              | 6245                  | 5532             |
| 30       | ETR1       | MECR        | 5.00E-47  | NP_057095         | NM_016011.1     | 10              | 2307                  | 1119             |
| 31       | GIM4       | PFDN2       | 1.00E-15  | NP_036526         | NM_012394.2     | 4               | 677                   | 462              |
| 32       | HCM1       | FOXL2       | 1.00E-20  | NP_075555         | NM_023067.2     | 1               | 1131                  | 1128             |
| 33       | HHF1       | HIST2H4     | 2.00E-37  | NP_003539         | NM_003548.2     | 1               | 396                   | 309              |
| 34       | ISA2       | HBLD1       | 2.00E-05  | NP_919255         | NM_194279.1     | 5               | 850                   | 462              |
| 35       | KAR3       | KIFC1       | 2.00E-69  | XP_371813         | XM_371813.1     | 11              | 2702                  | 2385             |
| 36       | KRE28      | ARID4A      | 3.00E-06  | NP_002883         | NM_002892.2     | 24              | 4818                  | 3771             |
| 37       | LSM6       | LSM6        | 5.00E-09  | NP_009011         | NM_007080.1     | 4               | 1350                  | 240              |
| 38       | MAD2       | MAD2L1      | 5.00E-38  | NP_002349         | NM_002358.2     | 5               | 1384                  | 615              |
| 39       | MCM16      | HDLBP       | 2.00E-03  | NP_976221         | NM_203346.1     | 28              | 5032                  | 3804             |
| 40       | MCD1       | RAD21       | 8.00E-08  | NP_006256         | NM_006265.1     | 14              | 3645                  | 1893             |
| 41       | MDJ1       | DNAJA3      | 2.00E-31  | NP_005138         | NM_005147.3     | 12              | 2684                  | 1440             |
| 42       | MET22      | IMPA1       | 4.00E-05  | NP_005527         | NM_005536.2     | 9               | 2322                  | 831              |
| 43       | MET7       | FPGS        | 1.00E-11  | NP_004948         | NM_004957.2     | 15              | 2487                  | 1761             |
| 44       | MUS81      | MUS81       | 1.00E-18  | NP_079404         | NM_025128.3     | 16              | 2318                  | 1653             |
| 45       | NUP170     | NUP155      | 2.00E-30  | NP_705618         | NM_153485.1     | 35              | 8057                  | 4173             |
| 46       | NUP84      | NUP107      | 5.00E-16  | NP_065134         | NM_020401.1     | 28              | 3123                  | 2775             |
| 47       | OAR1       | DHR57B      | 2.00E-13  | NP_056325         | NM_015510.3     | 7               | 1375                  | 975              |
| 48       | OMA1       | OMA1        | 6.00E-29  | NP_660286         | NM_145243.2     | 9               | 1935                  | 1572             |
| 49       | PAC10      | VBP1        | 4.00E-30  | NP_003363         | NM_003372.3     | 6               | 1778                  | 591              |
| 50       | PDR13      | HSPA8       | 2.00E-56  | NP_006588         | NM_006597.3     | 9               | 2260                  | 1938             |
| 51       | PDS5       | SCC-112     | 6.00E-32  | NP_056015         | NM_015200       | 33              | 6735                  | 3906             |
| 52       | PDS5       | APRIN       | 2.00E-31  | NP_055847         | NM_015032.1     | 36              | 7443                  | 4347             |
| 53       | PIG1       | PPP1R3C     | 2.00E-06  | NP_005389         | NM_005398.3     | 2               | 2567                  | 951              |
| 54       | PSH1       | TRIM25      | 1.00E-07  | NP_005073         | NM_005082.3     | 9               | 5744                  | 1890             |
| 55       | RAD1       | ERCC4       | 1.00E-109 | NP_005227         | NM_005236.1     | 11              | 2751                  | 2748             |
| 56       | RAD10      | ERCC1       | 1.00E-12  | NP_001974         | NM_001983.2     | 10              | 1101                  | 891              |
| 57       | RAD18      | RAD18       | 9.00E-20  | NP_064550         | NM_020165.2     | 13              | 5886                  | 1485             |
| 58       | RAD24      | RAD17       | 8.00E-17  | NP_579917         | NM_133339.1     | 18              | 2874                  | 2043             |
| 59       | RAD5       | SMARCA3     | 5.00E-70  | NP_620636         | NM_139048.1     | 25              | 5317                  | 3027             |
| 60       | RAD51      | RAD51       | 1.00E-122 | NP_002866         | NM_002875.2     | 10              | 2255                  | 1017             |
| 61       | RAD52      | RAD52       | 2.00E-40  | NP_002870         | NM_002879.2     | 11              | 2682                  | 1257             |
| 62       | RAD55      | RAD51L3     | 1.00E-05  | NP_002869         | NM_002878.2     | 10              | 23246                 | 984              |
| 63       | RAD57      | RAD51L1     | 4.00E-19  | NP_598193         | NM_133509.2     | 10              | 1155                  | 1152             |
| 64       | RAD6       | UBE2A       | 7.00E-61  | NP_003327         | NM_003336.2     | 6               | 1796                  | 456              |
| 65       | RAD61      | C1orf114    | 4.00E-03  | NP_067002         | NM_021179.1     | 6               | 1914                  | 1524             |
| 66       | RAD9       | DSPP        | 1.00E-07  | NP_055023         | NM_014208.1     | 6               | 3750                  | 3747             |
| 67       | RNH35      | RNASEH2A    | 7.00E-46  | NP_006388         | NM_006397.2     | 8               | 1072                  | 897              |
| 68       | RPA12      | ZNRD1       | 1.00E-14  | NP_740753         | NM_170783.1     | 5               | 743                   | 378              |
| 69       | RPB4       | POLR2D      | 3.00E-12  | NP_004796         | NM_004805.2     | 4               | 1900                  | 426              |
| 70       | RPL2B      | RPL8        | 1.00E-102 | NP_150644         | NM_033301.1     | 6               | 874                   | 771              |
| 71       | RTN2       | RTN2        | 5.00E-08  | NP_005610         | NM_005619.3     | 11              | 2282                  | 1635             |
| 72       | RTS1       | PPP2R5D     | 1.00E-148 | NP_006236         | NM_006245.2     | 16              | 2959                  | 1806             |
| 73       | RTT101     | CUL2        | 9.00E-06  | NP_003582         | NM_003591.2     | 21              | 4233                  | 2235             |
| 74       | RTT103     | C20orf77    | 3.00E-14  | NP_067038         | NM_021215.2     | 7               | 4219                  | 978              |
| 75       | SAC3       | MCM3AP      | 4.00E-26  | NP_003897         | NM_003906.3     | 28              | 6113                  | 5940             |
| 76       | SCC2       | NIPBL       | 3.00E-19  | NP_597677         | NM_015384.3     | 47              | 10435                 | 8412             |
| 77       | SCC3/IRRI1 | STAG1       | 2.00E-21  | NP_005853         | NM_005862.1     | 34              | 5166                  | 3774             |
| 78       | SCC3/IRRI1 | STAG3       | 3.00E-13  | NP_036579.2       | NM_012447       | 34              | 4289                  | 3675             |
| 79       | SCC3/IRRI1 | STAG2       | 2.00E-11  | NP_006594.3       | NM_006603       | 34              | 6045                  | 3693             |
| 80       | SCC4       | MAU-2       | N/A       | NP_056144.1       | NM_015329.2     | 19              | 4161                  | 654              |
| 81       | SGS1       | BLM         | 1.00E-115 | NP_000048         | NM_000057.1     | 22              | 4470                  | 4251             |
| 82       | SHM2       | SHMT1       | 1.00E-148 | NP_004160         | NM_004169.3     | 12              | 2511                  | 1449             |
| 83       | SHP1       | NSFL1C      | 6.00E-34  | NP_057227         | NM_016143.3     | 9               | 3644                  | 1110             |
| 84       | SIC1       | LOC284861   | 7.00E-02  | NP_963859         | NM_201565.1     | 2               | 3823                  | 858              |
| 85       | SLX8       | RNF10       | 7.00E-08  | NP_055683         | NM_014868.3     | 17              | 3784                  | 2433             |
| 86       | SMC1       | SMC1L1      | 1.00E-35  | NP_006297         | NM_006306.2     | 25              | 9725                  | 3699             |
| 87       | SMC1       | SMC1L2      | 6.00E-41  | NP_683515.3       | NM_148674       | 25              | 4268                  | 3723             |
| 88       | SMC3       | CSPG6       | 1.00E-45  | NP_005436.1       | NM_005445.3     | 29              | 4114                  | 3651             |
| 89       | SNU66      | SART1       | 2.00E-07  | NP_005137         | NM_005146.3     | 22              | 3561                  | 2400             |
| 90       | SPT4       | SUPT4HI     | 1.00E-18  | NP_003159         | NM_003168.1     | 5               | 1499                  | 351              |
| 91       | SRO7       | STXBPSL     | 4.00E-14  | XP_045911         | XM_045911.8     | 28              | 4370                  | 3558             |
| 92       | SSN6/CYC8  | UTX         | 9.00E-44  | NP_066963         | NM_021140.1     | 29              | 5438                  | 4203             |
| 93       | THP1       | PCID2       | 6.00E-07  | NP_060856         | NM_018386.1     | 15              | 1786                  | 1359             |
| 94       | TOF1       | TIMELESS    | 5.00E-07  | NP_003911         | NM_003920.1     | 29              | 4376                  | 3624             |
| 95       | TOP3       | TOP3A       | 1.00E-124 | NP_004609         | NM_004618.2     | 19              | 4116                  | 3003             |
| 96       | TPD3       | PPP2R1B     | 1.00E-133 | NP_859050         | NM_181699.1     | 16              | 2105                  | 2001             |
| 97       | TSA1       | PRDX2       | 7.00E-71  | NP_005800         | NM_005809.4     | 6               | 1007                  | 594              |
| 98       | UBR1       | UBR2        | 9.00E-28  | NP_056070         | NM_015255.1     | 47              | 7857                  | 5265             |
| 99       | YDL156W    | WDR76       | 3.00E-19  | NP_079184         | NM_024908.1     | 13              | 3978                  | 1878             |
| 100      | YLR193C    | PREL1       | 2.00E-22  | XP_371496         | XM_371496.2     | 13              | 929                   | 654              |
| 101      | YTA7       | ATAD2       | 1.00E-131 | NP_054828         | NM_014109.2     | 28              | 4896                  | 4170             |
| 102      | ZUO1       | ZRF1        | 1.00E-48  | XP_379909         | XM_379909.1     | 17              | 1877                  | 1752             |
