# Supplementary material
Source: PubMed Central journal article supplement (PMC2265152)
Supplement: pnas_0712384105_2.pdf [file pnas_0712384105_2.pdf]

Table 4. Significance analysis of mutation frequency for individual genes and for cohesin gene class

| Passenger mutation rates* | SMC1L1 | NIPBL  | CSPG6  | STAG3  | RNF20  | Cohesin genes class |
|---------------------------|--------|--------|--------|--------|--------|---------------------|
| External passenger rates  | 0.0001 | 0.0003 | 0.0344 | 0.0203 | 0.03   | 0.0002              |
| SNP passenger rates       | 0.0049 | 0.0073 | 0.0626 | 0.0432 | 0.0569 | 0.0053              |
| NS/S passenger rates      | 0.0468 | 0.0835 | 0.1428 | 0.0959 | 0.1375 | 0.2049              |

\*Passenger mutation rates are those from Wood *et al.* (1). External, based on previous mutational analyses; SNP, based on nonsynonymous to synonymous mutation ratios observed in germ-line single nucleotide polymorphisms (SNPs); NS/S, based on nonsynonymous (NS) to synonymous (S) mutation ratios observed among somatic mutations.

1. Wood LD, *et al.* (2007) The genomic landscapes of human breast and colorectal cancers. *Science* 318:1108-1113.
