# Supplementary material
Source: PubMed Central journal article supplement (PMC2265152)
Supplement: pnas_0712384105_3.pdf [file pnas_0712384105_3.pdf]

**Table 5. Previously analyzed CIN genes with homologs in *S. cerevisiae***

| <b>Celera accession</b> | <b>Genbank accession</b> | <b>Human Gene</b> | <b>Other gene name</b> | <b>Top yeast hit</b> |
|-------------------------|--------------------------|-------------------|------------------------|----------------------|
| hCT1826039              | NM_001184                | ATR               |                        | MEC1                 |
| hCT1826040              | NM_001184                | ATR               |                        | MEC1                 |
| hCT31470                | NM_006768                | BRAP              |                        | YHL010C              |
| hCT1643963              | NM_001254                | CDC6              |                        | CDC6                 |
| hCT30161                | NM_001274                | CHK1              |                        | CHK1                 |
| hCT23387                | NM_004734                | DCAMKL1           |                        | DUN1                 |
| hCT32971                | NM_007068                | DMC1              |                        | DMC1                 |
| hCT20952                | NM_000123                | ERCC5             |                        | RAD2                 |
| hCT32115                | NM_004111                | FEN1              | RAD27                  | RAD27                |
| hCT11790                | NM_012415                | FSBP              | RAD54B                 | RDH54                |
| hCT2334792              | NM_005591                | MRE11A            | MRE11                  | MRE11                |
| hCT32914                | NM_021076                | NEFH              |                        | CHS5                 |
| hCT23665                | NM_004153                | ORC1L             |                        | ORC1                 |
| hCT30362                | NM_002592                | PCNA              |                        | POL30                |
| hCT13660                | NM_002647                | PIK3C3            | VPS34                  | VPS34                |
| hCT14027                | NM_002691                | POLD1             |                        | CDC2                 |
| hCT23655                | NM_006231                | POLE              |                        | POL2                 |
| hCT87415                | NM_006231                | POLE              |                        | POL2                 |
| hCT28290                | NM_133338                | RAD17             |                        | RAD24                |
| hCT15239                | NM_005732                | RAD50             |                        | RAD50                |
| hCT30207                | NM_133487                | RAD51             |                        | RAD51                |
| hCT1686440              | NM_134422                | RAD52             |                        | RAD52                |
| hCT13183                | NM_003579                | RAD54L            |                        | RAD54                |
| hCT29790                | NM_002913                | RFC1              |                        | RFC1                 |
| hCT9089                 | NM_002914                | RFC2              |                        | RFC4                 |
| hCT23382                | NM_002915                | RFC3              |                        | RFC5                 |
| hCT30904                | NM_007370                | RFC5              |                        | RFC3                 |
| hCT19876                | NM_002945                | RPA1              |                        | RFA1                 |
| hCT23494                | NM_012238                | SIRT1             |                        | SIR2                 |
| hCT29050                | NM_012239                | SIRT3             |                        | HST2                 |
| hCT18373                | NM_004628                | XPC               |                        | RAD4                 |
| hCT1817729              | NM_012291                |                   | ESPL1/SEPARASE         | ESP1                 |
