# Supplementary material
Source: PubMed Central journal article supplement (PMC2265152)
Supplement: pnas_0712384105_4.pdf [file pnas_0712384105_4.pdf]

**Table 6. Summary of cell cycle analyses following siRNA-mediated down-regulation**

| <b>Percentage of Cells in</b> |                                        |                                    |                |                        |                           |                                |
|-------------------------------|----------------------------------------|------------------------------------|----------------|------------------------|---------------------------|--------------------------------|
| <b>Condition</b>              | <b>&lt;G<sub>0</sub>/G<sub>1</sub></b> | <b>G<sub>0</sub>/G<sub>1</sub></b> | <b>S-Phase</b> | <b>G<sub>2</sub>/M</b> | <b>&gt;G<sub>2</sub>M</b> | <b>FI &gt;G<sub>2</sub>/M*</b> |
| Untransfected                 | 1.02                                   | 38.62                              | 35.55          | 23.04                  | 1.55                      | 1.0                            |
| GAPD                          | 0.12                                   | 43.27                              | 43.42          | 11.69                  | 1.72                      | 1.11×                          |
| SMC1L1                        | 1.65                                   | 28.26                              | 42.97          | 17.29                  | 9.55                      | 6.16×                          |
| CSPG6                         | 1.37                                   | 28.65                              | 41.86          | 19.18                  | 8.62                      | 5.56×                          |
| STAG2                         | 1.58                                   | 28.87                              | 44.48          | 18.81                  | 5.78                      | 3.72×                          |
| MRE11A                        | 2.35                                   | 51.59                              | 28.08          | 14.12                  | 3.08                      | 1.99×                          |

\*FI, fold increase over the untransfected control cells.
