# Supplementary material
Source: PubMed Central journal article supplement (PMC2265152)
Supplement: pnas_0712384105_5.pdf [file pnas_0712384105_5.pdf]

**Table 7. Analysis of variance of unweighted mean >G<sub>2</sub>/M populations following siRNA-mediated down-regulation**

| <b>Group*</b> | <b>SS<sup>†</sup></b> | <b>df<sup>‡</sup></b> | <b>MS<sup>§</sup></b> | <b>F-Ratio<sup>¶</sup></b> | <b>P value</b> | <b>Reject H<sub>0</sub><sup>  </sup></b> |
|---------------|-----------------------|-----------------------|-----------------------|----------------------------|----------------|------------------------------------------|
| BG            | 182.9                 | 5                     | 36.58                 | 74.92                      | <0.0001        | Yes                                      |
| WG            | 5.859                 | 12                    | 0.4882                |                            |                |                                          |

\*Defines whether or not the analysis is between groups/treatments (BG) or within the group/treatment (WG).

<sup>†</sup>SS, sum of squares.

<sup>‡</sup>df, degrees of freedom.

<sup>§</sup>MS, mean square.

<sup>¶</sup>F-ratio is calculated by MS<sub>BG</sub>/MS<sub>WG</sub>.

<sup>||</sup>The null hypothesis (H<sub>0</sub>) is rejected if the P value is <0.05.
