# Supplementary material
Source: PubMed Central journal article supplement (PMC2265152)
Supplement: pnas_0712384105_6.pdf [file pnas_0712384105_6.pdf]

**Table 8. Multi-comparison tests of >G<sub>2</sub>/M populations after siRNA-mediated down-regulation**

|               | <b>Statistical Significance (<i>P</i> value)</b> |               |              |              |               |
|---------------|--------------------------------------------------|---------------|--------------|--------------|---------------|
|               | <b>GAPD</b>                                      | <b>SMC1L1</b> | <b>CSPG6</b> | <b>STAG2</b> | <b>MRE11A</b> |
| Untransfected | NS                                               | ***           | ***          | ***          | *             |
| GAPD          |                                                  | ***           | ***          | ***          | NS            |
| SMC1L1        |                                                  |               | NS           | ***          | ***           |
| CSPG6         |                                                  |               |              | **           | ***           |
| STAG2         |                                                  |               |              |              | **            |

Degrees of statistical significance: \*\*\*,  $P < 0.001$  ; \*\*,  $P < 0.01$  ; \*,  $P < 0.05$  ; NS,  $P > 0.05$ .
