# Supplementary material
Source: PubMed Central journal article supplement (PMC2265152)
Supplement: pnas_0712384105_7.pdf [file pnas_0712384105_7.pdf]

**Table 9. Chromosome counts after siRNA-mediated down-regulation**

| Condition     | n*  | Percentage of mitotic spreads |      |      |      |     |     |     |     |                                |
|---------------|-----|-------------------------------|------|------|------|-----|-----|-----|-----|--------------------------------|
|               |     | ≤43                           | 44   | 45   | 46   | 47  | 48  | 49  | ≥50 | FI <sub>≥50</sub> <sup>†</sup> |
| Untransfected | 310 | 4.5                           | 15.5 | 62.3 | 13.6 | 2.7 | 0.3 | 0.0 | 1.7 | 1.0                            |
| GAPD          | 380 | 9.2                           | 18.2 | 55.0 | 11.6 | 3.9 | 0.8 | 0.0 | 1.3 | 0.8×                           |
| SMC1L1        | 304 | 7.2                           | 16.1 | 46.7 | 13.2 | 6.6 | 0.7 | 0.7 | 8.9 | 5.5×                           |
| CSPG6         | 311 | 12.2                          | 15.1 | 48.6 | 9.6  | 4.5 | 1.6 | 0.0 | 8.4 | 5.2×                           |
| STAG2         | 315 | 8.3                           | 14.3 | 55.2 | 10.5 | 2.2 | 1.0 | 0.0 | 8.6 | 5.3×                           |
| MRE11A        | 307 | 5.2                           | 16.0 | 54.7 | 12.1 | 4.9 | 2.0 | 0.7 | 4.6 | 2.8×                           |

\*Represents the total number of mitotic spreads quantified.

<sup>†</sup>FI<sub>≥50</sub> represents the fold increase of the ≥50 population over that of the untransfected control.
