# Supplementary material
Source: PubMed Central journal article supplement (PMC2265152)
Supplement: pnas_0712384105_8.pdf [file pnas_0712384105_8.pdf]

**Table 10. Primary constriction gaps after siRNA-mediated down-regulation**

| Treatment     | Chromosome | n*  | Primary constriction cohesion |                  |                                  |
|---------------|------------|-----|-------------------------------|------------------|----------------------------------|
|               |            |     | Normal <sup>†</sup>           | PCG <sup>†</sup> | FI <sub>Total</sub> <sup>‡</sup> |
| Untransfected | 2          | 263 | 97.34                         | 2.66             | 1.0                              |
| GAPD          | 2          | 329 | 96.01                         | 3.99             | 1.5×                             |
| SMC1L1        | 2          | 238 | 89.92                         | 10.08            | 3.79×                            |
| CSPG6         | 2          | 313 | 87.11                         | 12.89            | 4.85×                            |
| STAG2         | 2          | 260 | 94.62                         | 5.38             | 2.02×                            |
| MRE11A        | 2          | 294 | 87.76                         | 12.24            | 4.60×                            |
| Untransfected | 4          | 263 | 95.44                         | 4.56             | 1.0                              |
| GAPD          | 4          | 329 | 96.35                         | 3.65             | 0.80×                            |
| SMC1L1        | 4          | 238 | 84.45                         | 15.55            | 3.41×                            |
| CSPG6         | 4          | 313 | 84.59                         | 15.41            | 3.38×                            |
| STAG2         | 4          | 260 | 91.54                         | 8.46             | 1.86×                            |
| MRE11A        | 4          | 294 | 90.82                         | 9.18             | 2.01×                            |
| Untransfected | 7          | 263 | 100.00                        | 0.00             | NA <sup>§</sup>                  |
| GAPD          | 7          | 329 | 99.69                         | 0.31             | 1.0 <sup>§</sup>                 |
| SMC1L1        | 7          | 238 | 90.34                         | 9.66             | 31.16× <sup>§</sup>              |
| CSPG6         | 7          | 313 | 86.48                         | 13.50            | 43.55× <sup>§</sup>              |
| STAG2         | 7          | 260 | 96.15                         | 3.85             | 12.42× <sup>§</sup>              |
| MRE11A        | 7          | 294 | 95.58                         | 4.42             | 14.26× <sup>§</sup>              |
| Untransfected | 13         | 263 | 99.24                         | 0.76             | 1.0                              |
| GAPD          | 13         | 329 | 98.77                         | 1.23             | 1.62×                            |
| SMC1L1        | 13         | 238 | 88.66                         | 11.34            | 14.92×                           |
| CSPG6         | 13         | 313 | 86.16                         | 13.84            | 18.21×                           |
| STAG2         | 13         | 260 | 98.46                         | 1.54             | 2.02×                            |
| MRE11A        | 13         | 294 | 95.58                         | 4.42             | 5.82×                            |

\*Number of mitotic spreads included in the analyses.

<sup>†</sup>Values represent percentages.

<sup>‡</sup>FI<sub>Total</sub> represents the relative fold increase of the PCG for the indicated condition over that of the untransfected control population.

<sup>§</sup>Because no aberrant primary constriction cohesion defects were observed in the untransfected population, the GAPD control value was substituted in the calculation of FI<sub>Total</sub>. NA, Not applicable.
