# Supplementary material
Source: PubMed Central journal article supplement (PMC2265152)
Supplement: pnas_0712384105_9.pdf [file pnas_0712384105_9.pdf]

**Table 11. Cell cycle analysis of cells with targeted deletions of CDC4**

| Cell line*          | Percentage of Cells in          |                                |         |                   |                   |                                               |
|---------------------|---------------------------------|--------------------------------|---------|-------------------|-------------------|-----------------------------------------------|
|                     | <G <sub>0</sub> /G <sub>1</sub> | G <sub>0</sub> /G <sub>1</sub> | S-Phase | G <sub>2</sub> /M | >G <sub>2</sub> M | FI <sub>&gt;G<sub>2</sub>M</sub> <sup>†</sup> |
| HCT116 control      | 0.25                            | 58.78                          | 19.38   | 19.24             | 2.35              | 1.0                                           |
| CDC4 <sup>+/-</sup> | 0.25                            | 54.60                          | 21.88   | 20.46             | 2.76              | 1.17×                                         |
| CDC4 <sup>-/-</sup> | 0.06                            | 59.24                          | 13.95   | 21.30             | 5.45              | 2.31×                                         |

\*Single representative value of an experiment performed in triplicate.

<sup>†</sup>FI, fold increase over the HCT116 parental control cells.
