# Supplementary material
Source: PubMed Central journal article supplement (PMC2265152)
Supplement: pnas_0712384105_10.pdf [file pnas_0712384105_10.pdf]

**Table 12. Cells lacking CDC4 exhibit increases in primary constriction gaps**

| Treatment           | Number* | Cohesed <sup>†</sup> | Primary constriction gap (PCG) |                                |                                 |                     |                                  |
|---------------------|---------|----------------------|--------------------------------|--------------------------------|---------------------------------|---------------------|----------------------------------|
|                     |         |                      | PCG <sub>I</sub> <sup>†</sup>  | PCG <sub>II</sub> <sup>†</sup> | PCG <sub>III</sub> <sup>†</sup> | Total <sup>‡‡</sup> | FI <sub>Total</sub> <sup>§</sup> |
| HCT116 control      | 215     | 93.95                | 5.58                           | 0.47                           | 0.00                            | 6.05                | NA                               |
| CDC4 <sup>+/-</sup> | 253     | 91.70                | 7.90                           | 0.40                           | 0.00                            | 8.30                | 1.37×                            |
| CDC4 <sup>-/-</sup> | 298     | 84.56                | 13.76                          | 1.01                           | 0.67                            | 15.44               | 2.55×                            |

\*Number of mitotic spreads included in the analyses.

<sup>†</sup>Values represent percentages.

<sup>‡‡</sup>Total represents the sum of PCG<sub>I</sub> + PCG<sub>II</sub> + PCG<sub>III</sub>.

<sup>§</sup>FI<sub>Total</sub> represents the relative fold increase of the total PCG for the indicated condition over that of the HCT116 parental control cells.
